# Supplementary material for: Comprehensive identification of the full-length transcripts and alternative splicing related to the secondary metabolism pathways in the tea plant (Camellia sinensis)
Source: PubMed Central journal article supplement (PMC6389920; doi:10.1038/s41598-019-39286-z), 2019-02-25
Supplement: 41598_2019_39286_MOESM1_ESM.pdf [file 41598_2019_39286_MOESM1_ESM.pdf]

# Comprehensive identification of the full-length transcripts and alternative splicing related to the secondary metabolism pathways in the tea plant (*Camellia sinensis*)

Dahe Qiao<sup>1</sup>, Chun Yang<sup>1</sup>, Juan Chen<sup>1</sup>, Yan Guo<sup>1</sup>, Yan Li<sup>1</sup>, Suzhen Niu<sup>2</sup>, Kemei Cao<sup>2</sup> & Zhengwu Chen<sup>1\*</sup>

<sup>1</sup> Tea Research Institute, Guizhou Academy of Agricultural Science, Guiyang 550006 Guizhou, China. <sup>2</sup> College of tea science, Guizhou University, Guiyang 550025 Guizhou, China

\*Correspondence: Z.W.C, Email: [zwchentea@163.com](mailto:zwchentea@163.com), Tel.: +86- 0851-83761972

## Additional Information

**Figure. S1** Flow diagram of the experimental design and joint analysis for PacBio sequencing and Illumina sequencing.

**Figure. S2** The results of transcriptome integrity assessment based on BUSCO using an embryophyta gene set. The total number of embryophyta gene sets used in this evaluation was 1,440.

**Figure. S3** Differential expression analysis of transcripts. (A) Correlation analysis of the expression between two samples. (B) The MA plot of the differentially expressed transcripts. Each point represents a transcript. The x-axis represents A value, which is the logarithm of the mean FPKM values of the two samples, and the y-axis represents M value, which is the logarithm of fold change (FC) in gene expression between two samples. The green dots and red dots represent down and up-regulated differentially expressed transcripts, respectively, and the black dots represent non-differentially expressed transcripts.

**Figure. S4** Functional distribution of COG annotation of the transcripts.

**Figure. S5** Correlation analysis of gene expression and secondary metabolite accumulation. The secondary metabolism-related structural genes with AS transcripts identified in this study were selected and the correlation analysis were performed on using the Gene Expression and Metabolite accumulation Correlation Analysis Tool (<http://tpia.teaplant.org/Gene2Metabolite.html>).

**Figure. S6** Sequence alignment of the amplified fragments of the AS isoforms. The primer sequences were underlined in red.

**Table S1.** Comparison of single molecule sequencing data of tea plant between two PacBio sequencing platforms.

**Table S2.** The differential expression transcripts identified in this study.

**Table S3.** The character of AS events identified in this study.

**Table S4.** The transcripts involved in flavonoid biosynthesis.

**Table S5.** The AS events of the transcripts involved in flavonoid, theanine and caffeine biosynthesis.

**Table S6.** The transcripts involved in theanine biosynthesis.

**Table S7.** The transcripts involved in caffeine biosynthesis.

**Table S8.** The character of fusion transcripts identified in this study.

**Table S9.** Correlation analysis of the gene expression and secondary metabolite accumulation.

**Table S10.** The primers used in this study.

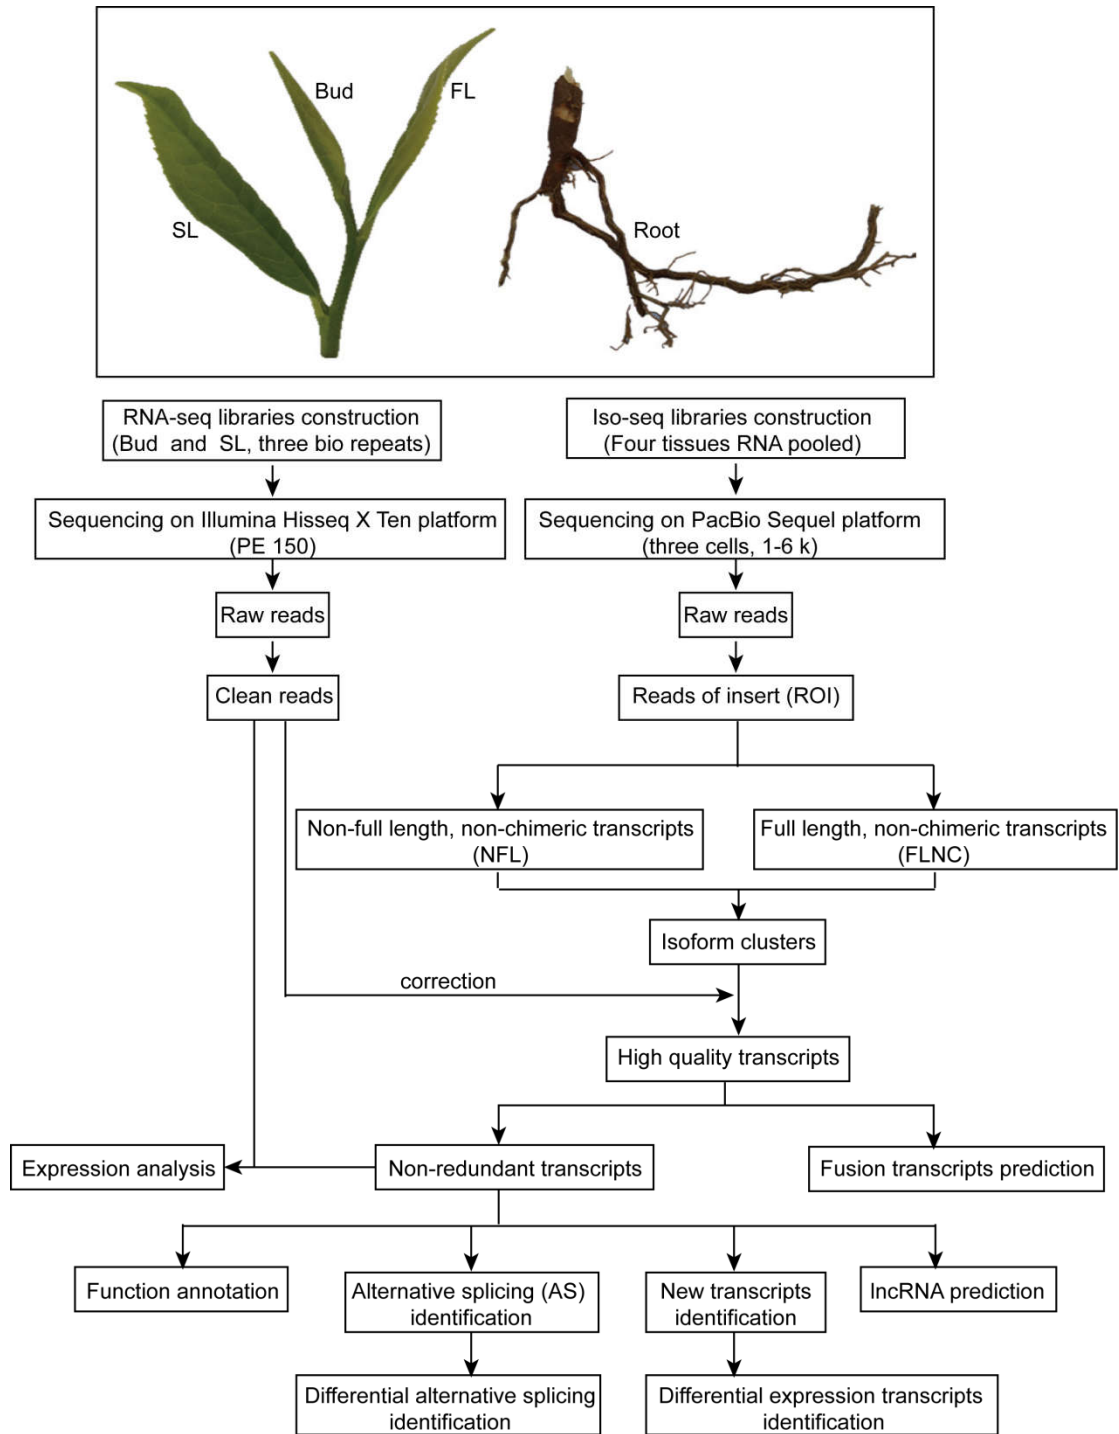

**Figure S1.** Flow diagram of the experimental design and joint analysis for PacBio sequencing and Illumina sequencing.

## BUSCO Assessment Results

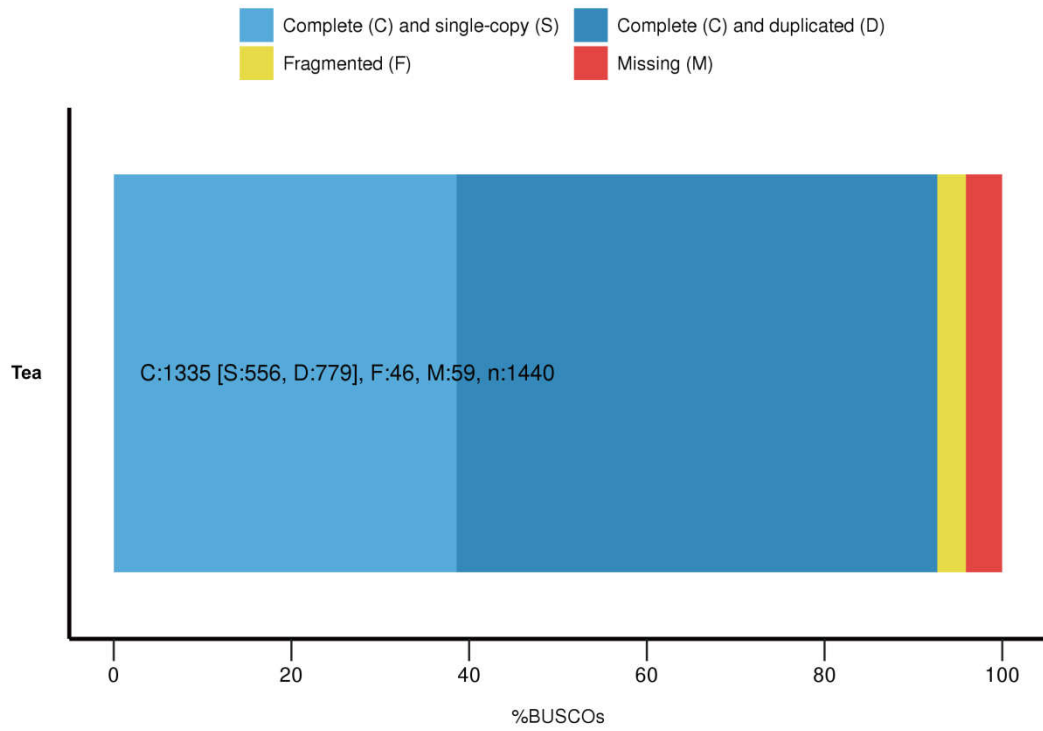

**Figure S2.** The results of transcriptome integrity assessment based on BUSCO using an embryophyta gene set. The total number of embryophyta gene sets used in this evaluation was 1,440.

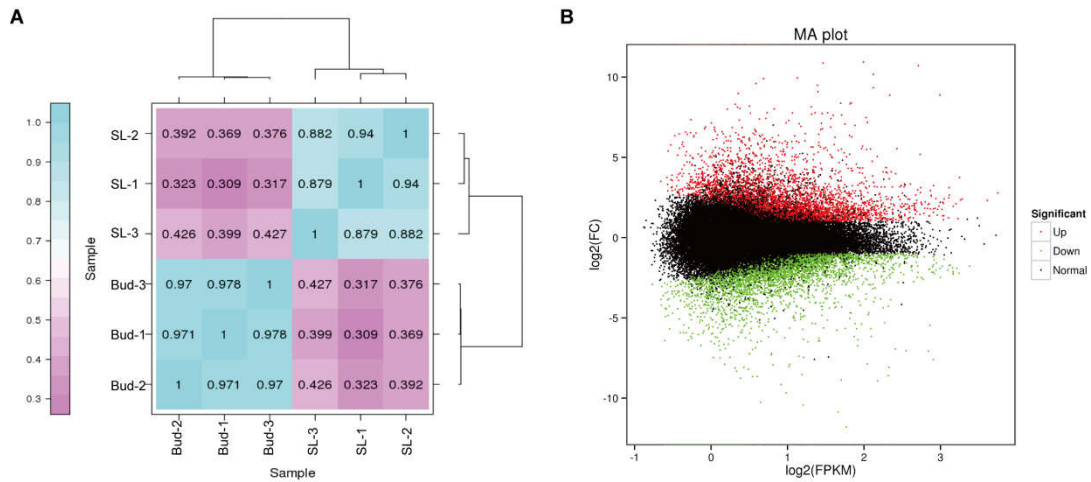

**Figure S3.** Differential expression analysis of transcripts. (A) Correlation analysis of the expression between two samples. (B) The MA plot of the differentially expressed transcripts. Each point represents a transcript. The x-axis represents A value, which is the logarithm of the mean FPKM values of the two samples, and the y-axis represents M value, which is the logarithm of fold change (FC) in gene expression between two samples. The green dots and red dots represent down and up-regulated differentially expressed transcripts, respectively, and the black dots represent non-differentially expressed transcripts.

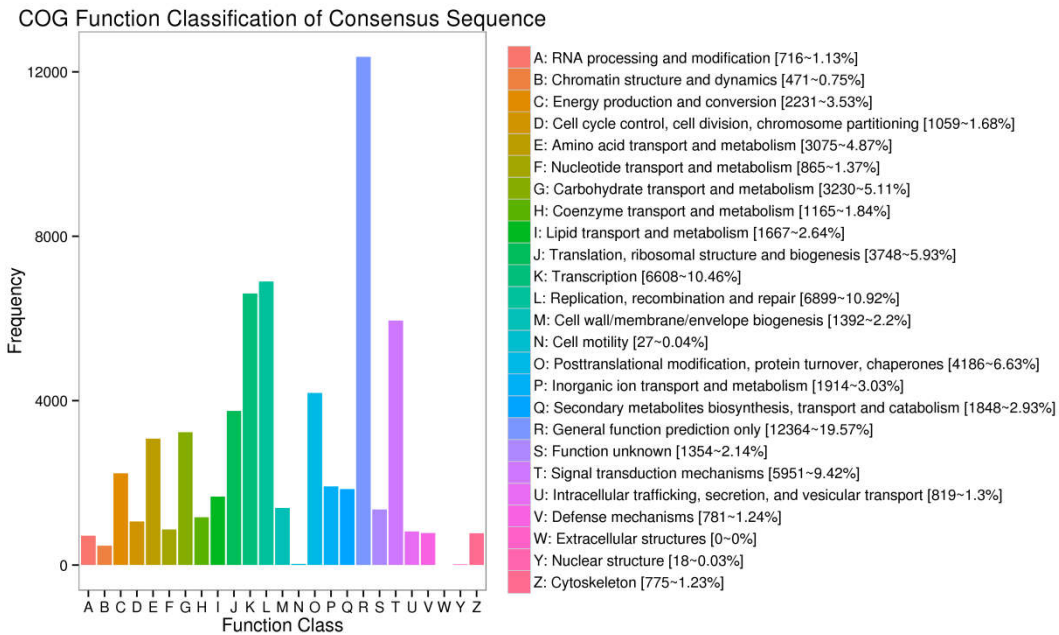

**Figure S4.** Functional distribution of COG annotation of the transcripts.

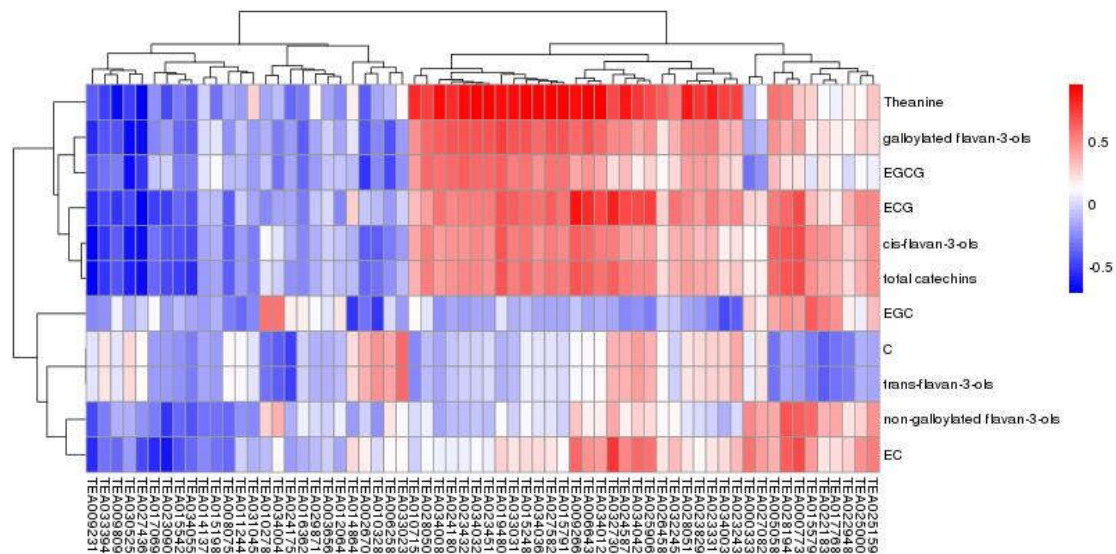

**Figure S5.** Correlation analysis of gene expression and secondary metabolite accumulation. The secondary metabolism-related structural genes with AS transcripts identified in this study were selected and the correlation analysis were performed on using the Gene Expression and Metabolite accumulation Correlation Analysis Tool (<http://tpia.teaplant.org/Gene2Metabolite.html>).

**Figure S6.** Sequence alignment of the amplified fragments of the AS isoforms. The primer sequences were underlined in red.

(A) Seq\_0:PB.1604.5, Seq\_1:PB.1604.2

Seq\_0 ----- 0  
Seq\_1 GGTGTGGAGGTAGTAGACGCACACGCTCACAATCTGGTGGCTCTGGACTCCACTCTTCTTCTCCAATGCTTTTCTGA 80

Seq\_0 ----- 0  
Seq\_1 AGCCTACGGCGATGCTTTATTGCTCGCACCCACGCTCTCAACTTCAAGAGAGGTATAAGGGATATTGCTGAACTGTATG 160

Seq\_0 ----- 0  
Seq\_1 GATCTGAGTTATCCTTGGATGGCATTCAAAAATACCGCAAGGGCAATGGATTGCAATCCATAAGCTCAATATGCTTCAAG 240

Seq\_0 ----- 0  
Seq\_1 GCTGCAAGAATCGCTGCAATACTCATTGATGATGGAATTGAGTTTGACAAAATGCATGACATTGAATGGCATAGGAATTT 320

Seq\_0 ----- 0  
Seq\_1 TGCACCGGTGGTTGGTAGAATATTGAGAATTGAGCATCTGGCTGAGAAGATTCTTGATGAAGGGAGGCCAGATGGATCTA 400

Seq\_0 ----- TCACTGAAACATTTATCGGAAAGTTGAAGTCAGTTGCTAATAAAATTGTTGGCTTGAAAAGC 62  
Seq\_1 CCTGGACATTGGACAGTTTCACTGAAACATTTATCGGAAAGTTGAAGTCAGTTGCTAATAAAATTGTTGGCTTGAAAAGC 480

Seq\_0 ATAGCTGCATACCGCAGTGGTCTTGAGATTAATACAAATGTCAACAAGGAAGGAGGCTCAAGCGGTCTTGTGGAAGTTTT 142  
Seq\_1 ATAGCTGCATACCGCAGTGGTCTTGAGATTAATACAAATGTCAACAAGGAAGGAGGCTCAAGCGGTCTTGTGGAAGTTTT 560

Seq\_0 AAATGCTGGGAGCCCCGTTTCGTATCACAAATAAAAACCTCATTGACTATCTCTTCGTGCAGAGTTTGGAGGTTGCCATAC 222  
Seq\_1 AAATGCTGGGAGCCCCGTTTCGTATCACAAATAAAAACCTCATTGACTATCTCTTCGTGCAGAGTTTGGAGGTTGCCATAC 640

Seq\_0 AATATGATTTGCCAATGCAGATACACACTGGTTTTGGAGATAAAGATTTGGATTTAAGGCTCTCCAATCCCTGCATCTC 302  
Seq\_1 AATATGATTTGCCAATGCAGATACACACTGGTTTTGGAGATAAAGATTTGGATTTAAGGCTCTCCAATCCCTGCATCTC 720

Seq\_0 CGCACCTTCTTGAGGACAAGAGATTCTCTAAGTGCCGCTTAGTACTTTTACATGCATCATACCCATTTTCAAAGGAAGC 382  
Seq\_1 CGCACCTTCTTGAGGACAAGAGATTCTCTAAGTGCCGCTTAGTACTTTTACATGCATCATACCCATTTTCAAAGGAAGC 800

Seq\_0 ATCATATCTAGCCTCCATTTATTTCTCAGGTTTACCTTGATTTGGTTGGCTGTTC 438  
Seq\_1 ATCATATCTAGCCTCCATTTATTTCTCAGGTTTACCTTCATTTGGTTGGCTGTTC 856







**(F) Seq\_0:PB.6810.2, Seq\_1:PB.6810.3**

Seq\_0 **TTCCGATCTTTGCAACTTGA**ATCTATCTGAGTC**ACCGAGAAGATCATTGCAGAGTACATATGGATCGGTGGATCTGGTA** 80  
Seq\_1 **TTCCGATCTTTGCAACTTGAATCTATCTGAGTC****ACCGAGAAGATCATTGCAGAGTACATATGGATCGGTGGATCTGGTA** 80

Seq\_0 **TGGACCTCAGA**AAGCAAAGCCAGGACCTGAATGCACCAGTCTCTGATCCTTCAAAGTTACCACAATGGAACCTACGATGGT 160  
Seq\_1 **TGGACCTCAGA**----- 91

Seq\_0 TCCAGCACTGGCCAAGCCCCTGGCGAGGACAGTGAAGTGATTTTATATCCCAGGCAATTTATAAGGACCCATTTCAGGAG 240  
Seq\_1 ----- 91

Seq\_0 **AGGCAACAACATTTCTTGTAAATGTGTGATGCTTACACGCCGGGTGGAGAGCCAATCCCAACAATAAGAGGTTTGATGCTG** 320  
Seq\_1 **-GGCAACAACATTTCTTGTAAATGTGTGATGCTTACACGCCGGGTGGAGAGCCAATCCCAACAATAAGAGGTTTGATGCTG** 170

Seq\_0 **CCAAGATATTCAGCCACCCTGATGTTGCTGAGGAACCTTGGTATGGTATAGAGCAGGAGTACACTTTGTTGCAGAAA** 400  
Seq\_1 **CCAAGATATTCAGCCACCCTGATGTTGCTGAGGAACCTTGGTATGGTATAGAGCAGGAGTACACTTTGTTGCAGAAA** 250

Seq\_0 **GAAGTGAAGTGGCCGATTGGTTGGCCTGTGGGAGGTTATCCTGGACCACAGGGACCATACTACTGTGGTATTGGTCCGGA** 480  
Seq\_1 **GAAGTGAAGTGGCCGATTGGTTGGCCTGTGGGAGGTTATCCTGGACCACAGGGACCATACTACTGTGGTATTGGTCCGGA** 330

Seq\_0 **TAAAGCTTTTGGGCGAGACATTGTCGATGCCATTATAAAGCATGTCTTTATGCTGGTATTAACATTAGTGGCATCAATG** 560  
Seq\_1 **TAAAGCTTTTGGGCGAGACATTGTCGATGCCATTATAAAGCATGTCTTTATGCTGGTATTAACATTAGTGGCATCAATG** 410

Seq\_0 **GAGAGGTGATGCCGGGTCAGTGGGAATCCAAGTTGGGCCTTCTGTTGGCATCAGTTCTGGAGATCAGTTGTGGATGGC** 639  
Seq\_1 **GAGAGGTGATGCCGGGTCAGTGGGAATCCAAGTTGGGCCTTCTGTTGGCATCAGTTCT****GGAGATCAGTTCTGGATGGC** 489

**Table S1.** Comparison of single molecule sequencing data of tea plant between two PacBio sequencing platforms.

| Platform                         | Library Size | Cell Number | Reads of Insert | Read Bases of Insert (bp) | Mean Read Length of Insert (bp) | Mean Read Quality of Insert | Mean Number of Passes |
|----------------------------------|--------------|-------------|-----------------|---------------------------|---------------------------------|-----------------------------|-----------------------|
| PacBio Sequel<br>(This study)    | 1-6K         | 3           | 1,388,066       | 2,446,983,161             | 1,762                           | 0.92                        | 10                    |
|                                  | <1K          | 2           | 55,037          | 42,298,256                | 768                             | 0.96                        | 33                    |
| PacBio RS II<br>(Xu et al. 2017) | 1-2K         | 2           | 135,732         | 293,235,156               | 2,160                           | 0.94                        | 11                    |
|                                  | 2-3K         | 2           | 119,629         | 361,701,882               | 3,023                           | 0.91                        | 9                     |
|                                  | 3-6K         | 1           | 51,549          | 200,280,602               | 3,885                           | 0.88                        | 4                     |
